# Supplementary material
Source: PubMed Central journal article supplement (PMC4468525)
Supplement: IAI.00282-15_zii999091270so1.pdf [file IAI.00282-15_zii999091270so1.pdf]

## Supplement Figure S1

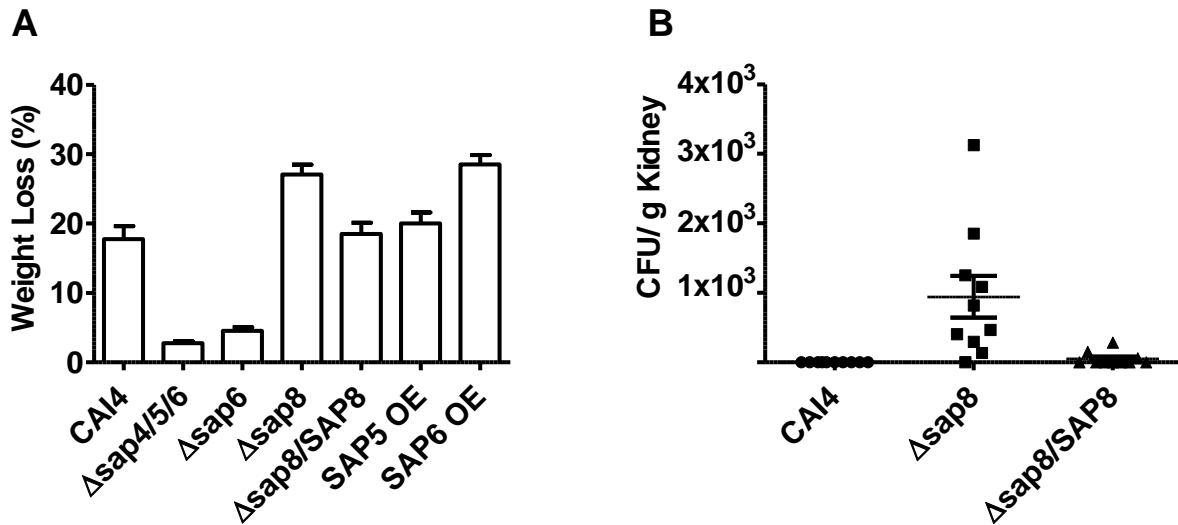

**Figure S1.** A) Average weight loss (using at least 10 mice per group) five days after *C. albicans* oral infection is shown as percentage change in mouse weight from one day before infection. Weight loss in mice after oral infection with  $\Delta sap8$  and *SAP6 OE* was significantly greater ( $P < 0.05$ ) than *CAI4* WT, while infection with  $\Delta sap6$  and  $\Delta sap4/5/6$  resulted in significantly less weight loss ( $P < 0.05$ ) than WT. Mice infected with the complemented strain  $\Delta sap8/SAP8$  and *SAP5 OE* had similar weight loss as WT. B) Mice orally infected with  $\Delta sap8$  had kidney dissemination five days after infection ( $1 \times 10^3$  CFU/ g kidney tissue), that was not found following infection with the complemented  $\Delta sap8/SAP8$  or WT strains.

Supplemental Figure S2

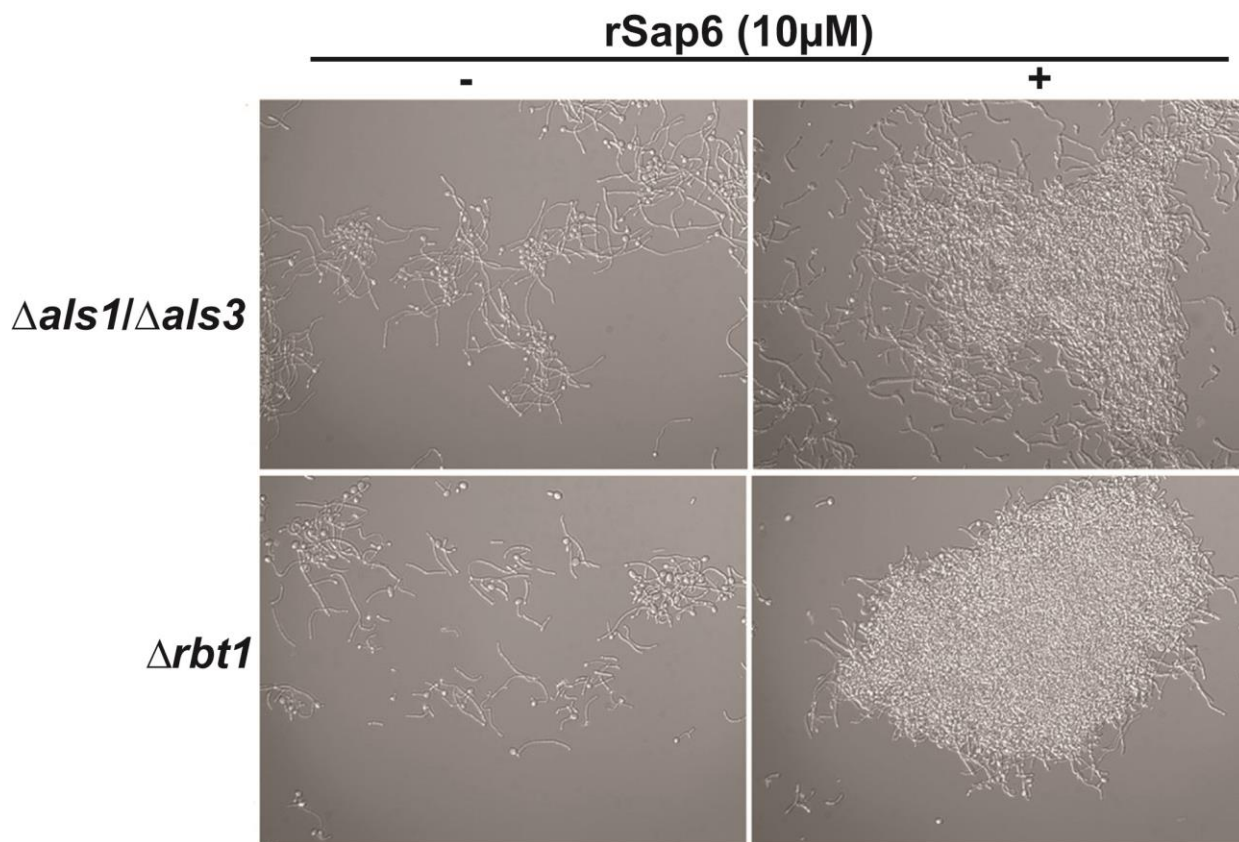

**Figure S2.** *C. albicans* hyphal specific adhesins Als and Rbt1 are not required for Sap6 mediated cellular aggregation. Germinated cells of *C. albicans*  $\Delta als1/\Delta als3$  or *C. albicans*  $\Delta rbt1$  were incubated with rSap6 (10μM). Sap6 induced aggregation in both mutant strains similarly to *CAI4*.
